# Supplementary material for: Trade-off between travel distance and prioritization of high-reward sites in traplining bumblebees
Source: PubMed Central journal article supplement (PMC3260656; doi:10.1111/j.1365-2435.2011.01881.x), 2011-12
Supplement: fec0025-1284-SD2.pdf [file fec0025-1284-SD2.pdf]

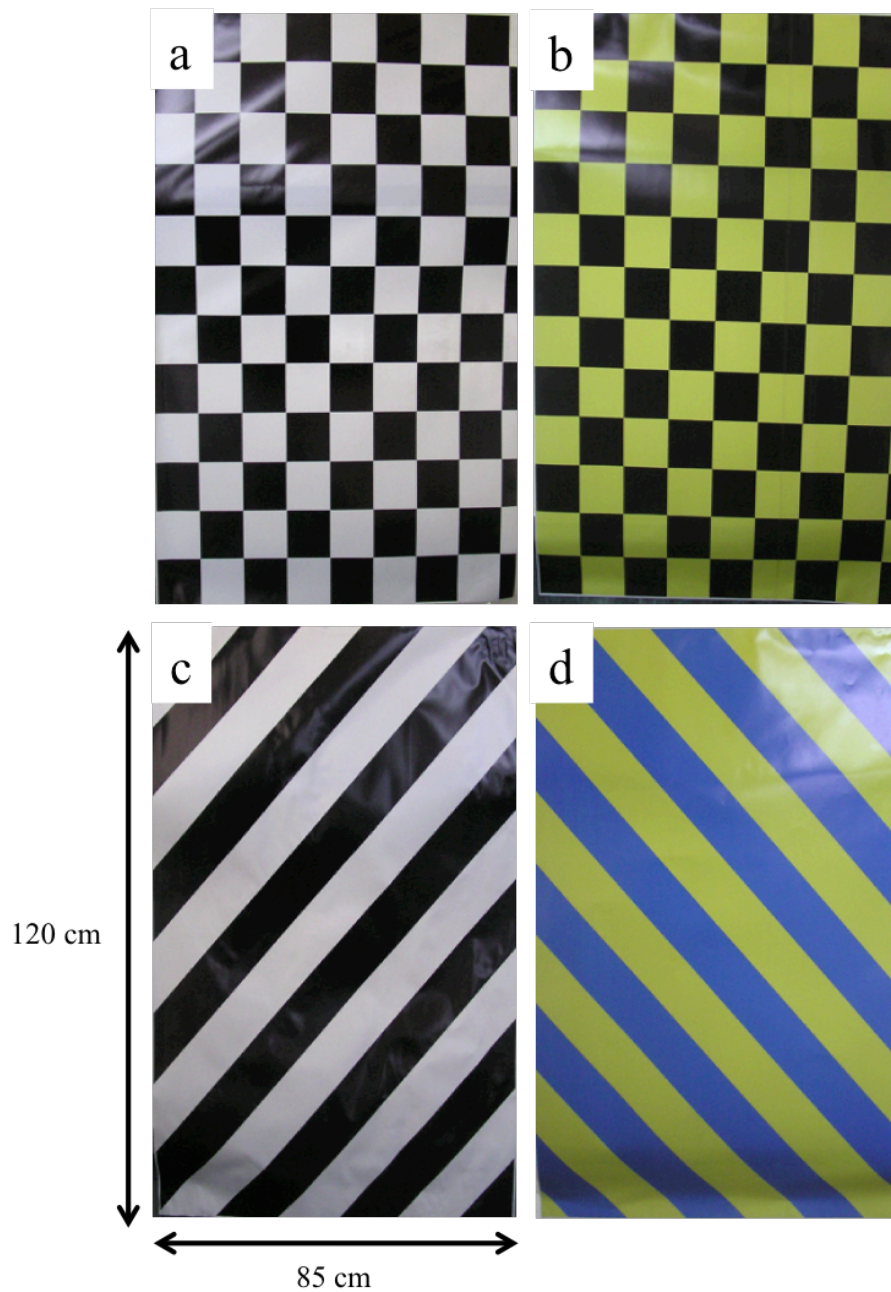

**Fig. S2.** Appearance of the geometric patterned posters (a-d) used as landmarks. Posters were fixed to the walls in each corner of the flight cage (Fig. 1).
