# Supplementary material for: Trade-off between travel distance and prioritization of high-reward sites in traplining bumblebees
Source: PubMed Central journal article supplement (PMC3260656; doi:10.1111/j.1365-2435.2011.01881.x), 2011-12
Supplement: fec0025-1284-SD3.pdf [file fec0025-1284-SD3.pdf]

Experiment 1

|         |         | indiv. 1 | indiv. 2 | indiv. 3 | indiv. 4 | indiv. 5 |
|---------|---------|----------|----------|----------|----------|----------|
| Phase 1 | bout 1  | 52143    | 1345     | 231      | 54123    | 321      |
|         | bout 2  | 2541     | 23514    | 12345 *  | 13542    | 342      |
|         | bout 3  | 45213    | 125      | 35412    | 15432    | 42153    |
|         | bout 4  | 12453    | 153      | 35412    | 15234    | 45123 *  |
|         | bout 5  | 5412     | 43125    | 21345    | 12543    | 45123 *  |
|         | bout 6  | 21543 *  | 32154 *  | 54231    | 3421     | 54123    |
|         | bout 7  | 24513    | 12354    | 15432    | 51423    | 4325     |
|         | bout 8  | 54213    | 35214    | 23154    | 14352    | 32154 *  |
|         | bout 9  | 51243    | 31254    | 23154    | 42135    | 4512     |
|         | bout 10 | 21543 *  | 34152    | 15423    | 54123    | 12435    |
|         | bout 11 | 12       | 23154    | 21534    | 3425     | 25413    |
|         | bout 12 | 12354    | 43215 *  | 21543 *  | 21534    | 34215    |
|         | bout 13 | 43215 *  | 54312    | 5412     | 51432    | 51234 *  |
|         | bout 14 | 43215 *  | 453      | 54123    | 45123 *  | 25413    |
|         | bout 15 | 21345    | 23154    | 2541     | 12345 *  | 45123 *  |
|         | bout 16 | 15423    | 51432    | 5412     | 51423    | 12345 *  |
|         | bout 17 | 23154    | 21543 *  | 2341     | 51243    | 23451 *  |
|         | bout 18 | 54321 *  | 325      | 54321 *  | 34512 *  | 45123 *  |
|         | bout 19 | 12543    | 54321 *  | 54123    | 12543    | 51234 *  |
|         | bout 20 | 21345    | 51423    | 34152    | 21543 *  | 51234 *  |
|         | bout 21 | 54321 *  | 34251    | 21543 *  | 52341    | 45123 *  |
|         | bout 22 | 32154 *  | 3542     | 21543 *  | 23154    | 451      |
|         | bout 23 | 12543    | 341      | 23154    | 51432    | 54312    |
|         | bout 24 | 21543 *  | 34521    | 21354    | 21354    | 23154    |
|         | bout 25 | 12345 *  | 51234 *  | 21543 *  | 54312    | 45123 *  |
|         | bout 26 | 32154 *  | 435      | 23154    | 51423    | 23541    |
|         | bout 27 | 43215 *  | 1534     | 21543 *  | 12354    | 51234 *  |
|         | bout 28 | 12345 *  | 21543 *  | 21534    | 54132    | 34512 *  |
|         | bout 29 | 12345 *  | 32154 *  | 23154    | 23154    | 51234 *  |
|         | bout 30 | 41235    | 45321    | 21543 *  | 54123    | 21543 *  |
|         | bout 31 | 21543 *  | 43215 *  | 23154    | 34521    | 21534    |
|         | bout 32 | 12345 *  | 54321 *  | 21543 *  | 12354    | 51234 *  |
|         | bout 33 | 45321    | 45132    | 54321 *  | 12345 *  | 45123 *  |
|         | bout 34 | 12345 *  | 43215 *  | 21543 *  | 23451 *  | 54123    |
|         | bout 35 | 12345 *  | 15432    | 23154    | 23451 *  | 12354    |
|         | bout 36 | 43251    | 15432    | 21543 *  | 34251    | 54123    |
|         | bout 37 | 51243    | 15432    | 21543 *  | 12345 *  | 51243    |
|         | bout 38 | 15432    | 32154 *  | 32154 *  | 34512 *  | 54123    |
|         | bout 39 | 12354    | 43215 *  | 12354    | 54123    | 45123 *  |
|         | bout 40 | 32145    | 43215 *  | 32154 *  | 54123    | 45123 *  |
| bout 41 | 342     | 21543    | 21543 *  | 23451 *  | 12345 *  |          |
| bout 42 | 321     | 32154 *  | 54123    | 34512 *  | 32541    |          |
| bout 43 | 23451 * | 45321    | 15432    | 23451 *  | 34512 *  |          |
| bout 44 | 43215 * | 43215 *  | 23145    | 45123 *  | 423      |          |
| bout 45 | 51234   | 54321 *  | 15432    | 23451 *  | 45123 *  |          |
| bout 46 | 21534   | 45132    | 21543 *  | 45123 *  | 32451    |          |
| bout 47 | 54321 * | 43215 *  | 42513    | 51432    | 12345 *  |          |
| bout 48 | 12543   | 15432    | 45123 *  | 34512 *  | 54123    |          |
| bout 49 | 32451   | 34152    | 54132    | 43215 *  | 54231    |          |
| bout 50 | 21345   | 23154    | 15432    | 32145    | 54123    |          |
| bout 51 | 52134   | 43215 *  | 21543 *  | 23541    | 54123    |          |
| bout 52 | 54321 * | 54312    | 14325    | 43521    | 13       |          |
| bout 53 | 51234   | 45213    | 54123    | 21543 *  | 34512 *  |          |
| bout 54 | 21345   | 52143    | 32415    | 54213    | 21345    |          |
| bout 55 | 12345 * | 54321 *  | 43215 *  | 43251    | 54123    |          |
| bout 56 | 53214   | 34125    | 12345 *  | 45123 *  | 43215 *  |          |
| bout 57 | 51243   | 51243    | 43215 *  | 23451 *  | 43       |          |
| bout 58 | 51234   | 351      | 21534    | 12345 *  | 32514    |          |
| bout 59 | 41532   | 12543    | 1345     | 12534    | 12345 *  |          |
| bout 60 | 52341   | 32154 *  | 43215 *  | 123      | 32541    |          |
| bout 61 | 53214   | 21354    | 21543 *  | 23451 *  | 45132    |          |
| bout 62 | 32145   | 32154 *  | 12543    | 23451 *  | 32514    |          |
| bout 63 | 21345   | 54321 *  | 51432    | 23154    | 45123 *  |          |
| bout 64 | 54321 * | 15432    | 54321 *  | 12345 *  | 51234 *  |          |
| bout 65 | 23154   | 21543 *  | 21543 *  | 23145    | 51234 *  |          |
| bout 66 | 53241   | 54321 *  | 51243    | 23451 *  | 12345 *  |          |
| bout 67 | 32145   | 12543    | 1243     | 51234    | 34512 *  |          |
| bout 68 | 32154 * | 21543 *  | 43215 *  | 23451 *  | 12354    |          |
| bout 69 | 32154 * | 12       | 15432    | 23451 *  | 34512 *  |          |
| bout 70 | 34512 * | 52143    | 43215 *  | 23145    | 31254    |          |
| bout 71 | 12345 * | 54321 *  | 45321    | 51234    | 42351    |          |
| bout 72 | 12345 * | 35124    | 21543 *  | 45123 *  | 12345 *  |          |
| bout 73 | 34512 * | 12543    | 15432    | 23451 *  | 34512 *  |          |
| bout 74 | 15432   | 32154 *  | 32154 *  | 54123    | 23451 *  |          |
| bout 75 | 34512 * | 54321 *  | 54321 *  | 34512 *  | 51234 *  |          |
| bout 76 | 32145   | 435      | 43215 *  | 23451 *  | 34512 *  |          |
| bout 77 | 32154 * | 21543 *  | 43215 *  | 45123 *  | 23451 *  |          |
| bout 78 | 12354   | 54321 *  | 21543 *  | 23451 *  | 34512 *  |          |
| bout 79 | 54231   | 21354    | 43215 *  | 23451 *  | 23451 *  |          |
| bout 80 | 34512 * | 54321 *  | 43215 *  | 34512 *  | 23145    |          |

Experiment 2

|         |         | indiv. 6 | indiv. 7 | indiv. 8 | indiv. 9 | indiv. 10 |
|---------|---------|----------|----------|----------|----------|-----------|
| Phase 2 | bout 1  | 54123    | 1354     | 35412    | 152      | 53142     |
|         | bout 2  | 54213    | 45132    | 15432    | 12345 *  | 15342     |
|         | bout 3  | 54312    | 4351     | 34521    | 14523    | 51234     |
|         | bout 4  | 12534    | 54321 *  | 32154    | 32451    | 5214      |
|         | bout 5  | 54123    | 415      | 54312    | 51243    | 54213     |
|         | bout 6  | 54312    | 51432    | 34152    | 54132    | 1523      |
|         | bout 7  | 54132    | 32415    | 54321 *  | 54123    | 21543     |
|         | bout 8  | 125      | 51342    | 41352    | 54321 *  | 14532     |
|         | bout 9  | 54321 *  | 23154    | 23415    | 51423    | 1513      |
|         | bout 10 | 54312    | 51234    | 21543    | 51432    | 15432     |
|         | bout 11 | 54321 *  | 25413    | 34251    | 54123    | 15432     |
|         | bout 12 | 125      | 15324    | 15432    | 54123    | 2314      |
|         | bout 13 | 12543    | 51234    | 12543    | 15423    | 23415     |
|         | bout 14 | 512      | 32145    | 25143    | 32154    | 213       |
|         | bout 15 | 12345 *  | 45312    | 54321 *  | 21453    | 2341      |
|         | bout 16 | 54312    | 15234    | 34215    | 43215    | 21345     |
|         | bout 17 | 43512    | 51342    | 51243    | 21543    | 12345 *   |
|         | bout 18 | 54312    | 121      | 54321 *  | 54123    | 15        |
|         | bout 19 | 15432    | 51324    | 32154    | 21543    | 54321 *   |
|         | bout 20 | 12543    | 15324    | 12543    | 54123    | 12345 *   |
|         | bout 21 | 12354    | 43152    | 51342    | 51243    | 12345 *   |
|         | bout 22 | 54321 *  | 51324    | 54321 *  | 51423    | 13452     |
|         | bout 23 | 54321 *  | 52341    | 54321 *  | 12543    | 23451     |
|         | bout 24 | 12345 *  | 51234    | 12345 *  | 12354    | 12354     |
|         | bout 25 | 12345 *  | 23145    | 51432    | 54132    | 21534     |
|         | bout 26 | 12345 *  | 54321 *  | 54123    | 52143    | 51432     |
|         | bout 27 | 54321 *  | 54321 *  | 12354    | 24315    | 54123     |
|         | bout 28 | 12345 *  | 51234    | 54321 *  | 15234    | 52341     |
|         | bout 29 | 54321 *  | 53214    | 54321 *  | 15423    | 12345 *   |
|         | bout 30 | 54321 *  | 54321 *  | 54132    | 51234    | 34521     |
|         | bout 31 | 54312    | 54321 *  | 54132    | 54321 *  | 45123     |
|         | bout 32 | 54321 *  | 54321 *  | 54321 *  | 15234    | 41235     |
|         | bout 33 | 54321 *  | 54321 *  | 12453    | 51432    | 12534     |
|         | bout 34 | 54321 *  | 54321 *  | 54321 *  | 12345 *  | 54321 *   |
|         | bout 35 | 54321 *  | 54321 *  | 15432    | 54321 *  | 54123     |
|         | bout 36 | 54321 *  | 54312    | 13254    | 32145    | 43215     |
|         | bout 37 | 54312    | 54321 *  | 54321 *  | 54321 *  | 12345 *   |
|         | bout 38 | 54312    | 34215    | 43215    | 23154    | 12345 *   |
|         | bout 39 | 54321 *  | 54123    | 12543    | 54321 *  | 52341     |
|         | bout 40 | 54321 *  | 34512    | 52314    | 54321 *  | 43215     |
| bout 41 | 12      | 54321 *  | 51234    | 1234     | 23451    |           |
| bout 42 | 1235    | 54321 *  | 12543    | 51432    | 43215    |           |
| bout 43 | 54321 * | 54321 *  | 51234    | 42135    | 41235    |           |
| bout 44 | 152     | 54312    | 15432    | 52134    | 12345 *  |           |
| bout 45 | 54321 * | 31524    | 54321 *  | 31524    | 43215    |           |
| bout 46 | 54312   | 54321 *  | 43215    | 54321 *  | 54321 *  |           |
| bout 47 | 51432   | 54321 *  | 512      | 54321 *  | 12534    |           |
| bout 48 | 23451   | 54321 *  | 54321 *  | 812      | 21354    |           |
| bout 49 | 54123   | 21345    | 541      | 43521    | 43215    |           |
| bout 50 | 45      | 32514    | 54321 *  | 54321 *  | 12543    |           |
| bout 51 | 51234   | 152      | 54321 *  | 21345    | 13452    |           |
| bout 52 | 12345 * | 54321 *  | 54312    | 51234    | 21345    |           |
| bout 53 | 542     | 43512    | 15423    | 51234    | 51234    |           |
| bout 54 | 54321 * | 54321 *  | 15432    | 15432    | 32145    |           |
| bout 55 | 54321 * | 54321 *  | 15432    | 32154    | 54123    |           |
| bout 56 | 54312   | 21345    | 54321 *  | 54123    | 51234 *  |           |
| bout 57 | 23451   | 15432    | 15432    | 12345 *  | 23451    |           |
| bout 58 | 21543   | 123      | 15432    | 54321    | 51234    |           |
| bout 59 | 54321 * | 15432    | 15432    | 12435    | 12345 *  |           |
| bout 60 | 12345 * | 531      | 54312    | 54321 *  | 51234    |           |
| bout 61 | 23451   | 12354    | 12543    | 123      | 51234    |           |
| bout 62 | 54123   | 43521    | 15432    | 43215    | 51234    |           |
| bout 63 | 54312   | 125      | 15432    | 15423    | 23154    |           |
| bout 64 | 54321 * | 54321 *  | 15       | 54321 *  | 51432    |           |
| bout 65 | 21543   | 43215    | 21543    | 54321 *  | 51234    |           |
| bout 66 | 12345 * | 43215    | 51243    | 43215    | 51234 *  |           |
| bout 67 | 43215 * | 15432    | 12543    | 543      | 12345 *  |           |
| bout 68 | 15432   | 23451    | 54321 *  | 54321 *  | 51234    |           |
| bout 69 | 21345   | 43512    | 54321 *  | 54312    | 23451    |           |
| bout 70 | 51      | 34512    | 13425    | 51234    | 51234    |           |
| bout 71 | 15432   | 21534    | 541      | 15432    | 12345 *  |           |
| bout 72 | 54123   | 54312    | 51243    | 54312    | 12345 *  |           |
| bout 73 | 12      | 12345    | 15432    | 15432    | 12345 *  |           |
| bout 74 | 15432   | 51342    | 15432    | 15432    | 12345 *  |           |
| bout 75 | 15432   | 23451    | 12       | 15432    | 21345    |           |
| bout 76 | 25431   | 35142    | 15234    | 53412    | 12345 *  |           |
| bout 77 | 12543   | 23154    | 51234    | 15432    | 13245    |           |
| bout 78 | 15234   | 12534    | 15432    | 43215    | 51234    |           |
| bout 79 | 15432   | 15432    | 15       | 43125    | 51432    |           |
| bout 80 | 54321 * | 53124    | 12543    | 12543    | 15432    |           |

Experiment 3

|         |         | indiv. 11 | indiv. 12 | indiv. 13 | indiv. 14 | indiv. 15 |
|---------|---------|-----------|-----------|-----------|-----------|-----------|
| Phase 2 | bout 1  | 514       | 32        | 124       | 54132     | 21345     |
|         | bout 2  | 123       | 1532      | 42315     | 45123     | 12354     |
|         | bout 3  | 32154     | 53        | 45132     | 54321 *   | 51234     |
|         | bout 4  | 54123     | 1345      | 5413      | 43512     | 12345 *   |
|         | bout 5  | 43125     | 1323      | 54        | 12453     | 12345 *   |
|         | bout 6  | 51423     | 432       | 152       | 45123     | 12345 *   |
|         | bout 7  | 514       | 3125      | 23145     | 21543     | 51234     |
|         | bout 8  | 15432     | 3125      | 24153     | 43521     | 12345 *   |
|         | bout 9  | 54321 *   | 53421     | 54123     | 514       | 12345 *   |
|         | bout 10 | 34521     | 1513      | 54        | 54123     | 12345 *   |
|         | bout 11 | 1345      | 3121      | 123       | 123       | 54123     |
|         | bout 12 | 34512     | 54321 *   | 25314     | 45312     | 23451     |
|         | bout 13 | 54312     | 54321 *   | 32145     | 45231     | 51234     |
|         | bout 14 | 54321 *   | 54321 *   | 34125     | 43215     | 12345 *   |
|         | bout 15 | 132       | 54321 *   | 15234     | 21345     | 154       |
|         | bout 16 | 54312     | 5315      | 23154     | 45123     | 5421      |
|         | bout 17 | 54321 *   | 51234     | 34251     | 12345 *   | 12345 *   |
|         | bout 18 | 12345 *   | 12354     | 15342     | 15432     | 25134     |
|         | bout 19 | 123       | 15432     | 54321 *   | 45231     | 45123     |
|         | bout 20 | 54321 *   | 15432     | 15342     | 21543     | 142       |
|         | bout 21 | 12345 *   | 51432     | 53214     | 54312     | 5124      |
|         | bout 22 | 15342     | 15243     | 54321 *   | 45123     | 34        |
|         | bout 23 | 12345 *   | 51432     | 31245     | 45123     | 34512     |
|         | bout 24 | 12543     | 54321 *   | 54321 *   | 52314     | 1235      |
|         | bout 25 | 3125      | 51243     | 54321 *   | 31254     | 12345 *   |
|         | bout 26 | 54321 *   | 12345     | 23415     | 21354     | 23451     |
|         | bout 27 | 54321 *   | 54321 *   | 32154     | 12354     | 12345 *   |
|         | bout 28 | 54321 *   | 54321 *   | 15432     | 54123     | 1234      |

**Fig. S3.** Flower visitation sequences (excluding revisits to the same flower). For each bee (columns 1-15), visitation sequences are sorted in chronological order (bouts 1-40: phase 1; bouts 41-80: phase 2). Numbers 1-5 in each row refer to the spatial location of each flower in the array (see Fig. 1): hence a bee moving clockwise round the pentagonal array in order starting with a visit to flower 1 would be recorded as '12345'. Colour codes (44 combinations of font and cell colours) indicate the sequences observed significantly more often than expected by chance during phases 1 and 2 (multinomial test with a random probability 0.0083:  $p < 0.05$ ). \*: sequences minimizing travel distance (phases 1 and 2); †: sequences maximizing initial rate of food intake (phase 2). Incomplete sequences, in which at least one of the five flowers was not visited, are indicated using a red font and white cell background (these sequences were not included in analyses).
