# Supplementary material for: Trade-off between travel distance and prioritization of high-reward sites in traplining bumblebees
Source: PubMed Central journal article supplement (PMC3260656; doi:10.1111/j.1365-2435.2011.01881.x), 2011-12
Supplement: fec0025-1284-SD4.pdf [file fec0025-1284-SD4.pdf]

**Table S1.** Cartesian coordinates (x; y, scale in metres) of the nest-box, the artificial flowers, and the landmarks in the flight room.

|                                | x    | y    |
|--------------------------------|------|------|
| Nest-box (experiment 1)        | 3.70 | 5.10 |
| Nest-box (experiments 2 and 3) | 3.70 | 0.10 |
| Flower 1                       | 1.65 | 2.28 |
| Flower 2                       | 0.38 | 6.17 |
| Flower 3                       | 3.70 | 8.59 |
| Flower 4                       | 7.02 | 6.18 |
| Flower 5                       | 5.75 | 2.28 |
| Landmark a                     | 1.00 | 0.00 |
| Landmark b                     | 1.00 | 8.70 |
| Landmark c                     | 6.30 | 8.70 |
| Landmark d                     | 6.30 | 0.00 |
