# Supplementary material for: Trade-off between travel distance and prioritization of high-reward sites in traplining bumblebees
Source: PubMed Central journal article supplement (PMC3260656; doi:10.1111/j.1365-2435.2011.01881.x), 2011-12
Supplement: fec0025-1284-SD5.pdf [file fec0025-1284-SD5.pdf]

**Table S2.** Minimum distances (in cm) the bees would travel if they visited each flower once in a clockwise or anticlockwise sequence, in relation to the first visited flower (see Fig. 1). \*: shortest possible distance.

| Flower visitation sequence |       | Flight distance (experiment 1) | Flight distance (experiments 2 and 3) |
|----------------------------|-------|--------------------------------|---------------------------------------|
| Clockwise                  | 12345 | 2338 *                         | 2238 *                                |
|                            | 23451 | 2338 *                         | 2631                                  |
|                            | 34512 | 2338 *                         | 3181                                  |
|                            | 45123 | 2338 *                         | 3181                                  |
|                            | 51234 | 2338 *                         | 2631                                  |
| Anticlockwise              | 15432 | 2338 *                         | 2631                                  |
|                            | 21543 | 2338 *                         | 3181                                  |
|                            | 32154 | 2338 *                         | 3181                                  |
|                            | 43215 | 2338 *                         | 2631                                  |
|                            | 54321 | 2338 *                         | 2238 *                                |
